# Supplementary material for: Tunable coffee-ring formation of halloysite nanotubes by evaporating sessile drops
Source: Royal Society of Chemistry journal article supplement (doi:10.1039/d1sm01150b), 2021-01-01
Supplement: d1sm01150b1.pdf [file d1sm01150b1.pdf]

Supporting Information for

**Tunable Coffee-Ring Formation of Halloysite Nanotubes by  
Evaporating Sessile Drops**

*Hongzhong Liu, Yao Wang, Yumin Luo, Min Guo, Yue Feng, Mingxian Liu\**

Department of Materials Science and Engineering, Jinan University, Guangzhou

510632, China

\*Corresponding author. Email: [liumx@jnu.edu.cn](mailto:liumx@jnu.edu.cn)

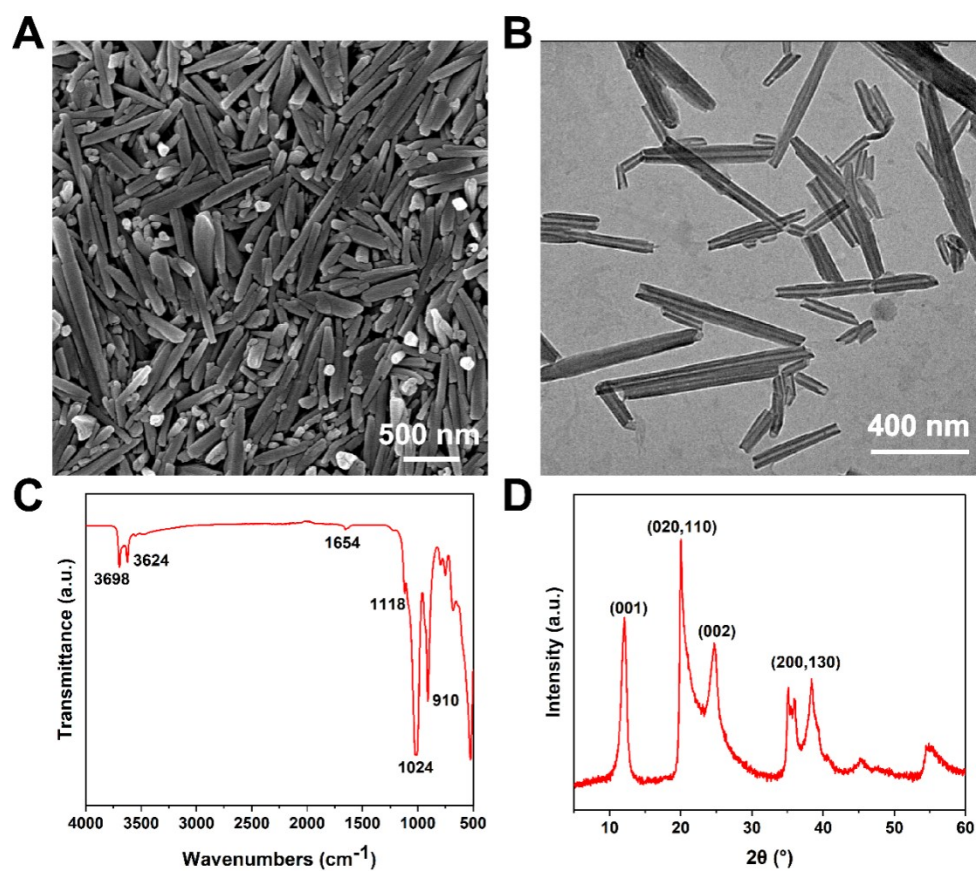

**Figure S1.** Characterization of halloysite nanotubes: SEM (A), TEM (B), FTIR (C) and XRD (D).

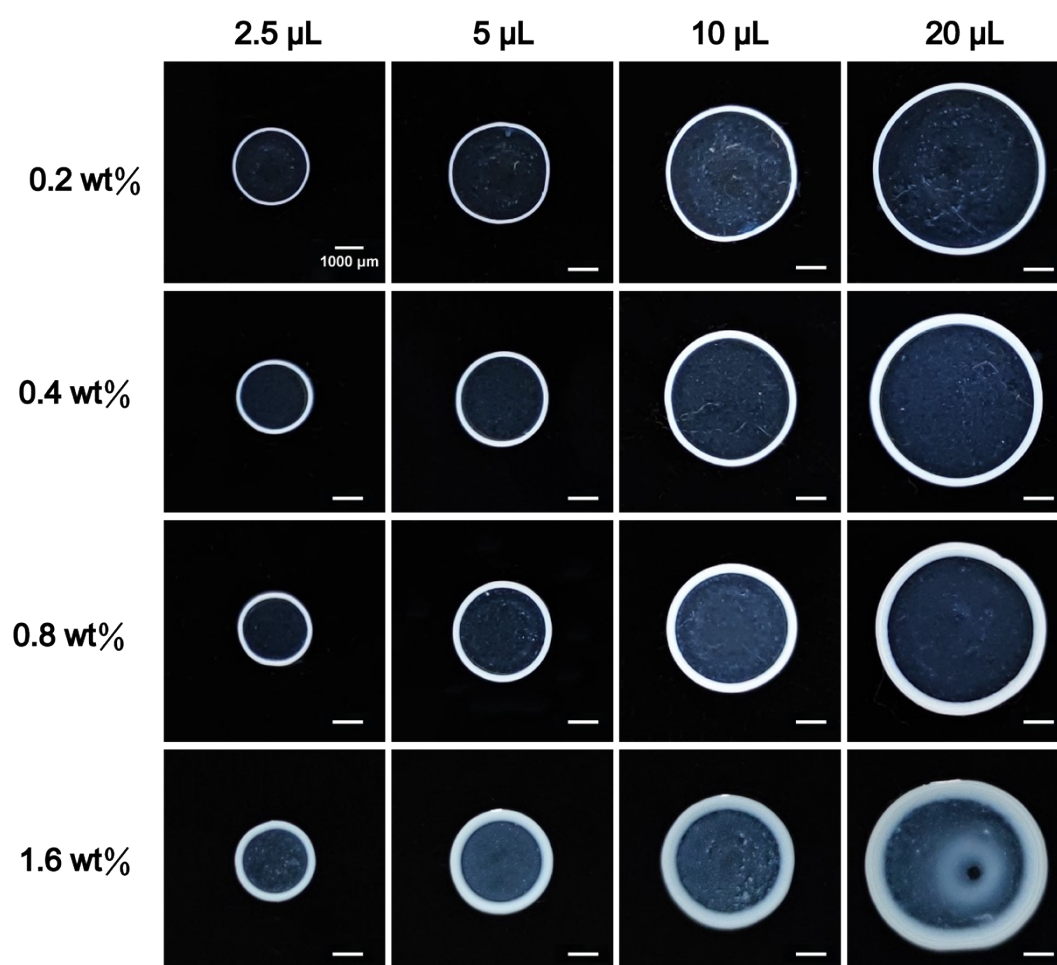

**Figure S2.** Appearance of HNTs coffee-ring patterns at different concentration and droplet volume.

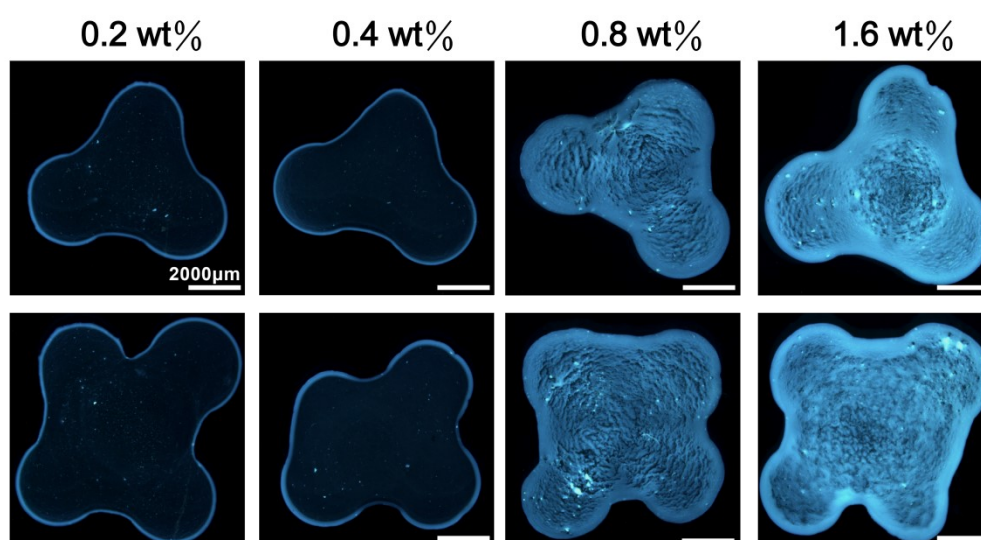

**Figure S3.** Different patterns formed by the interactions between three (top) and four (bottom) HNTs drops.

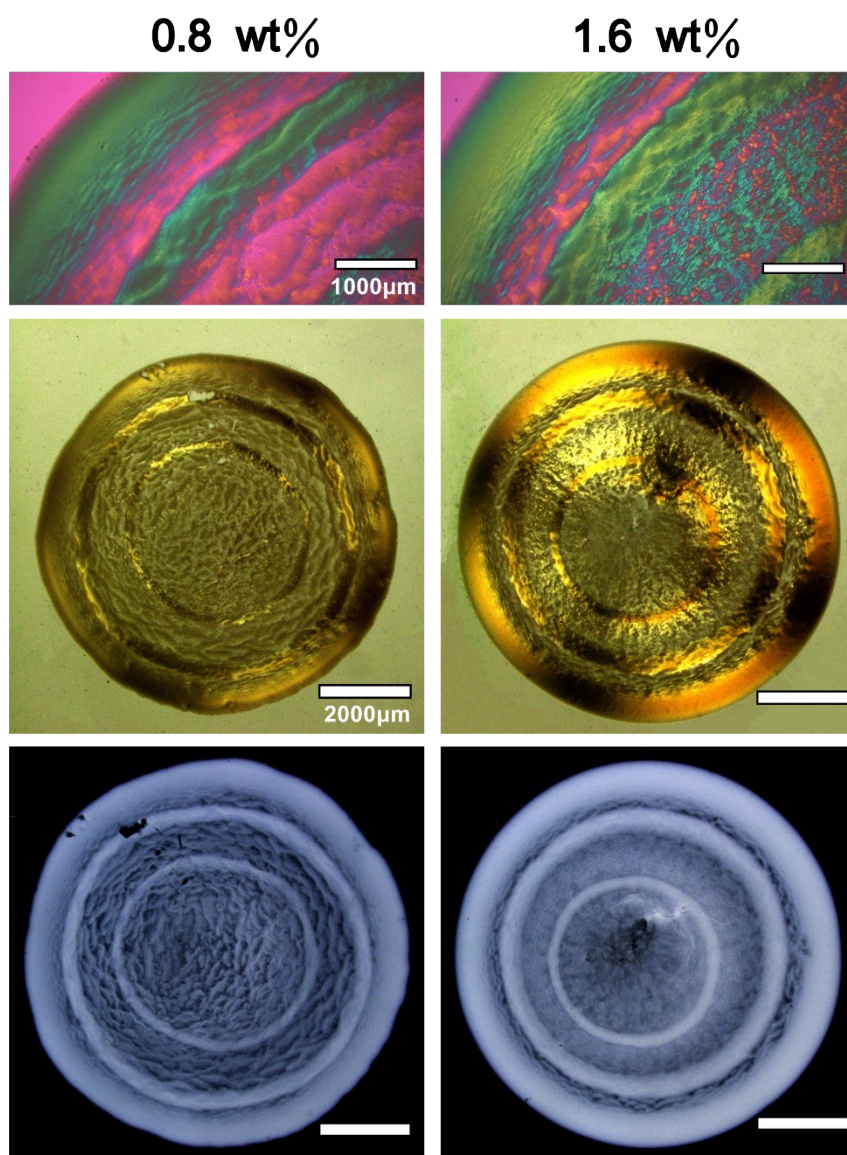

**Figure S4.** Ring-in-ring patterns formed by the evaporation of smaller HNTs droplet after formation of the bigger HNTs coffee-ring pattern: (A) POM images; (B) stereomicroscope images; (C) appearance photos.

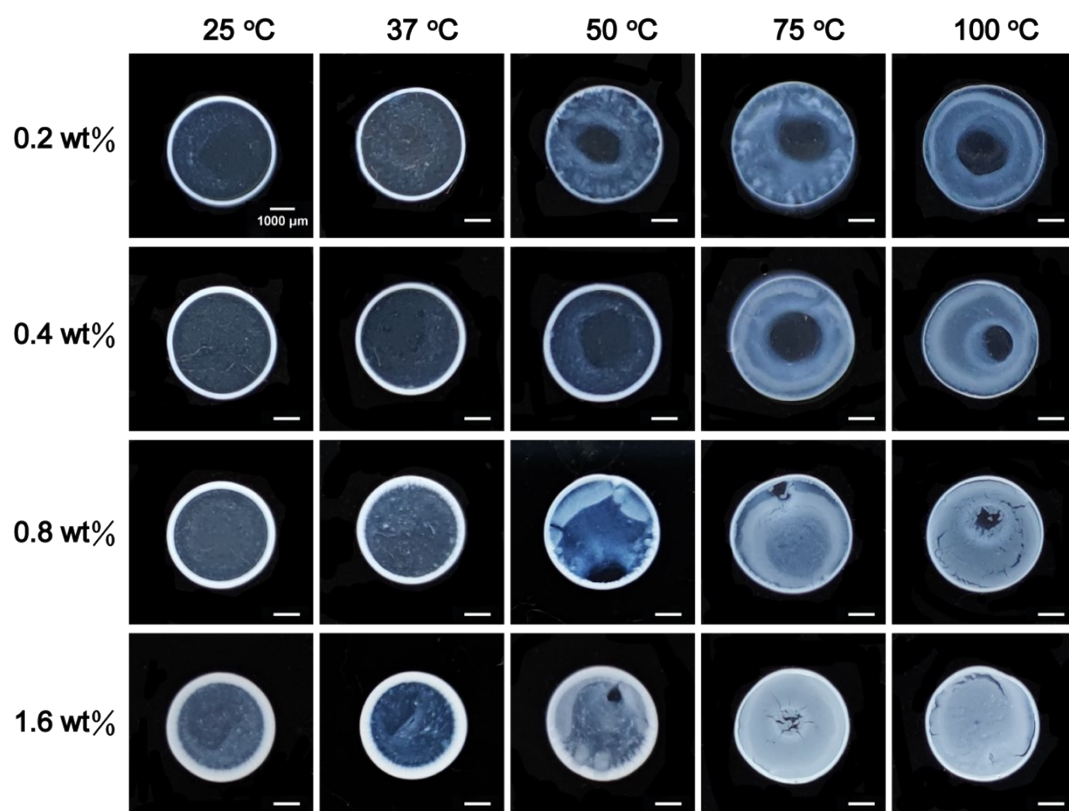

**Figure S5.** Effect of substrate temperature on the coffee-ring patterns at different concentration.
